# Supplementary material for: The Polycomb Group Protein Pcgf1 Is Dispensable in Zebrafish but Involved in Early Growth and Aging
Source: PubMed Central journal article supplement (PMC4956247; doi:10.1371/journal.pone.0158700), 2016-07-21
Supplement: pone.0158700.s002.pdf [file pone.0158700.s002.pdf]

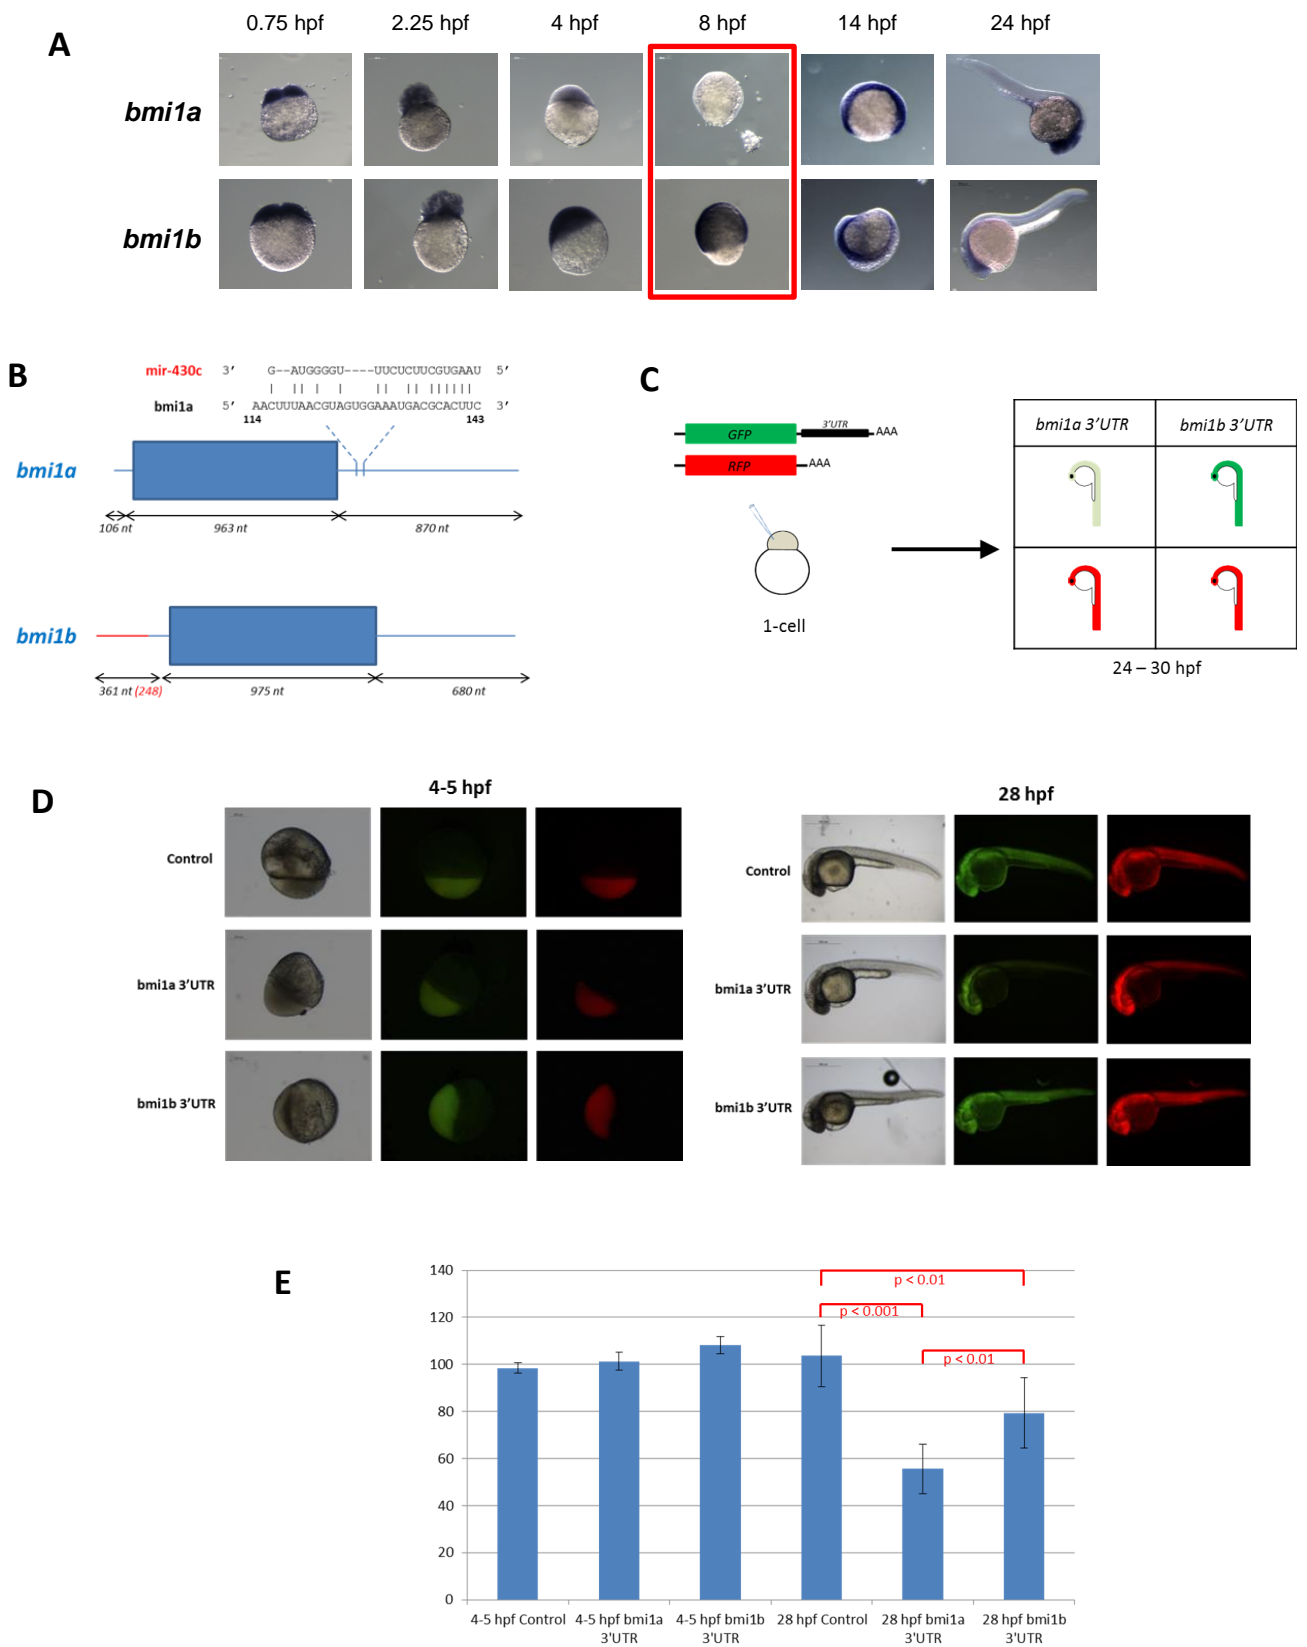

Supporting Information – S2 Fig
