# Supplementary material for: The Polycomb Group Protein Pcgf1 Is Dispensable in Zebrafish but Involved in Early Growth and Aging
Source: PubMed Central journal article supplement (PMC4956247; doi:10.1371/journal.pone.0158700), 2016-07-21

**A**

**Pcgf1<sup>wt</sup>**

MAEQGPMAIAMRLRNQLQNVIKLDPLRNEEEVKIKIKDLNEHIV  
CYLCAGYFIDATTITECLHTFCKSCIVKYLQTSKYCPMCNIIKH  
ETQPLLNKLDIVYKLVPGLOESEDKRIKEFYQSRGLER  
IIQPSGEESVPDNTGLPYTSFDHSAHFYRYDEQVSLCLERQSS  
SFSGKDKNKLTLLQKFVRCVRAEVRHLRQVLCVRLNVEKHQVQ  
MLFNNEESLPDHMTMKRLWLSHWFGKAQPLVLHYTIKDKRTR\*

**Pcgf1<sup>mut</sup>**

MAEQGPMAIAMRLRNQLQNVIKLDPLRNEEEVKIKIKDLNEHIV  
CYLCAGY↓NHHHRMSPYVLQELHCEVSPDQQVLSNV\*

**B**

**pcgf1<sup>(+/+)</sup>**

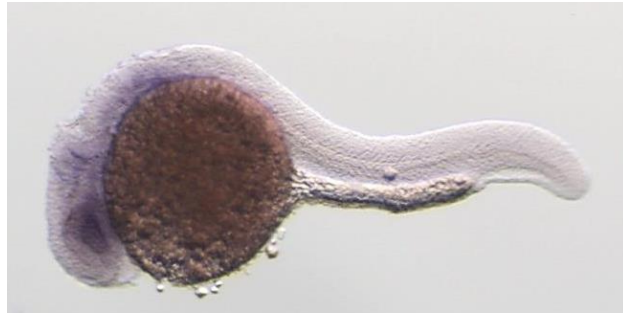

**pcgf1<sup>(-/-)</sup>**

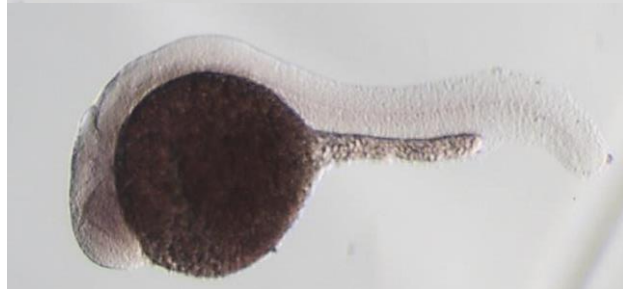

Supplement: pone.0158700.s003.pdf [file pone.0158700.s003.pdf]
