# Supplementary material for: The Polycomb Group Protein Pcgf1 Is Dispensable in Zebrafish but Involved in Early Growth and Aging
Source: PubMed Central journal article supplement (PMC4956247; doi:10.1371/journal.pone.0158700), 2016-07-21

**A**

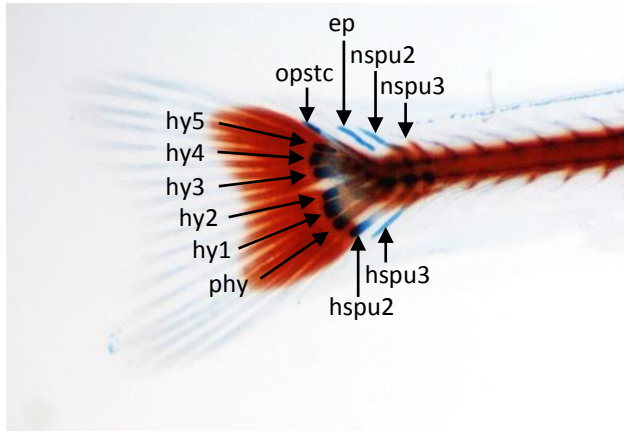

**B**

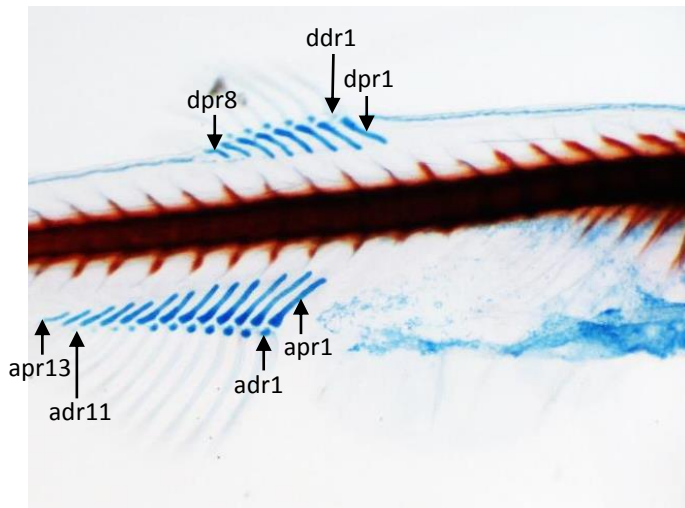

Supplement: pone.0158700.s004.pdf [file pone.0158700.s004.pdf]
