# Supplementary material for: The Polycomb Group Protein Pcgf1 Is Dispensable in Zebrafish but Involved in Early Growth and Aging
Source: PubMed Central journal article supplement (PMC4956247; doi:10.1371/journal.pone.0158700), 2016-07-21
Supplement: pone.0158700.s005.pdf [file pone.0158700.s005.pdf]

**pcgf1<sup>+/+</sup>**

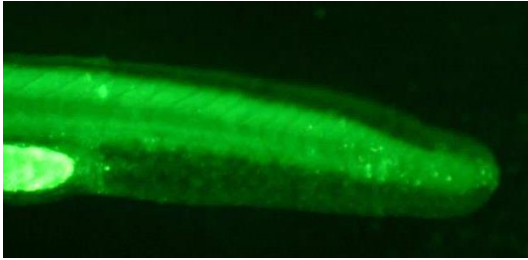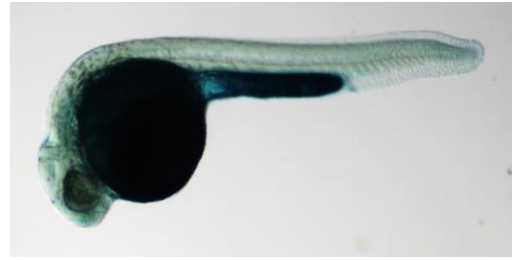

**pcgf1<sup>-/-</sup>**

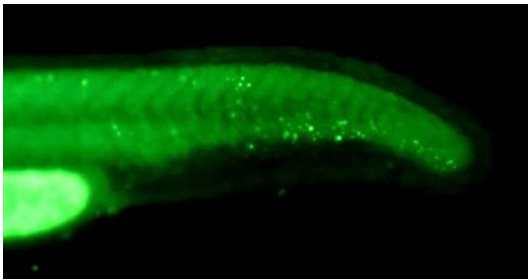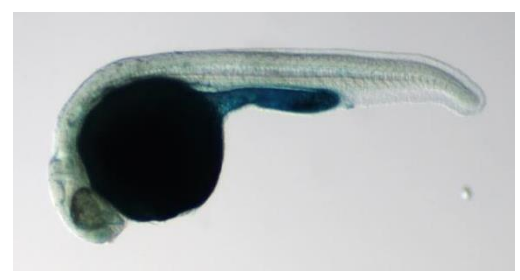

Apoptosis detection by acridine orange

Detection of senescence-associated  $\beta$ -galactosidase
